# Supplementary material for: A novel simplified ground-based thermal infrared (TIR) system for volcanic plume geometry, SO 2 columnar abundance, and flux retrievals
Source: Copernicus journal article supplement (doi:10.5194/amt-18-5281-2025), 2025-10-14
Supplement: Supplementary file [file amt-18-5281-2025-supplement-title-page.pdf › amt-18-5281-2025-supplement-title-page.pdf]

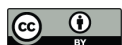

## *Supplement of*

# **A novel simplified ground-based thermal infrared (TIR) system for volcanic plume geometry, SO<sub>2</sub> columnar abundance, and flux retrievals**

**Lorenzo Guerrieri et al.**

*Correspondence to:* Lorenzo Guerrieri ([lorenzo.guerrieri@ingv.it](mailto:lorenzo.guerrieri@ingv.it))

- [amt-18-5281-2025-supplement-title-page.pdf](#)
- [vid\\_virs2\\_2024-08-30T051813\\_2024-08-30T061858\\_t1\\_40.3s.mp4](#)
- [vid\\_virs2\\_2024-08-30T061901\\_2024-08-30T071858\\_t1\\_39.8s.mp4](#)

The copyright of individual parts of the supplement might differ from the article licence.
